# Supplementary material
Source: PubMed Central journal article supplement (PMC1283949)
Supplement: 7600850s1.pdf [file 7600850s1.pdf]

**A**

| FISH <sup>a</sup> | pre-BI                                  | <i>ex vivo</i><br>transitional<br>pre-BI                 | <i>in vitro</i><br>transitional<br>pre-BI <sup>b</sup>          | pre-<br>BCR <sup>+</sup>                                  | pre-BII                                | immature<br>B                         | mature<br>B <sup>c</sup>              |
|-------------------|-----------------------------------------|----------------------------------------------------------|-----------------------------------------------------------------|-----------------------------------------------------------|----------------------------------------|---------------------------------------|---------------------------------------|
| RNA               | CD19 <sup>+</sup><br>c-kit <sup>+</sup> | B220 <sup>+</sup> c-kit <sup>+</sup><br>CD2 <sup>+</sup> | B220 <sup>+</sup> c-kit <sup>+</sup><br>s $\mu$ HC <sup>+</sup> | B220 <sup>+</sup><br>SL156 <sup>+</sup><br>k <sup>-</sup> | B220 <sup>+</sup><br>CD25 <sup>+</sup> | B220 <sup>+</sup><br>IgM <sup>+</sup> | B220 <sup>+</sup><br>IgM <sup>+</sup> |
| DNA               | B220 <sup>+</sup><br>c-kit <sup>+</sup> |                                                          |                                                                 |                                                           | B220 <sup>+</sup><br>CD25 <sup>+</sup> |                                       | CD43<br>depletion                     |

**B**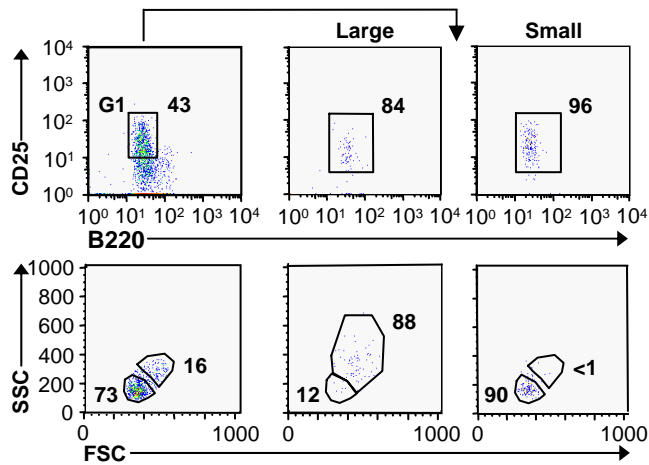

Cell sorting. (A) <sup>a</sup> BM cells were sorted on a FACSVantageSE™ or FACSaria (Becton Dickinson) into discrete developmental stages using specific surface markers. Cells were analyzed by RNA or DNA FISH. <sup>b</sup> s $\mu$ HC<sup>+</sup> cells were sorted using the Alexa Fluor® 488 Signal Amplification Kit (Molecular Probes). <sup>c</sup> Splenic B cells for DNA-FISH were enriched by CD43 depletion using magnetic beads (Miltenyl Biotech). Typically, sort purities were >90%, except large pre-BII cells ~80%. (B) The pre-BII population was gated as B220<sup>+</sup>CD25<sup>+</sup> (G1) and sorted into large and small fractions using forward scatter. The numbers show the percentage of cells within the indicated gates before and after sorting.
