# Supplementary material
Source: PubMed Central journal article supplement (PMC1283949)
Supplement: 7600850s2.pdf [file 7600850s2.pdf]

## Parker et al, Suppl 2

### Transcription patterns of the $\lambda 5$ and CD45 genes during B cell development <sup>a</sup>

|                                      | pre-BI <sup>b</sup> |   |    |    | large pre-BII |    |    |    | small pre-BII |   |    |   | immature B |    |    |    |
|--------------------------------------|---------------------|---|----|----|---------------|----|----|----|---------------|---|----|---|------------|----|----|----|
|                                      | 0                   | 1 | 2  | 4  | 0             | 1  | 2  | 4  | 0             | 1 | 2  | 4 | 0          | 1  | 2  | 4  |
| RNA signals per nucleus <sup>c</sup> |                     |   |    |    |               |    |    |    |               |   |    |   |            |    |    |    |
| <b>CD45</b>                          |                     |   |    |    |               |    |    |    |               |   |    |   |            |    |    |    |
| PCNA <sup>-</sup>                    | 25                  | 4 | 33 | 1  | 3             | 3  | 22 | 7  | 19            | 7 | 68 | 5 | 19         | 5  | 67 | 9  |
| PCNA <sup>+</sup>                    | 10                  | 3 | 8  | 16 | 11            | 1  | 12 | 41 | 0             | 0 | 1  | 0 | nd         | nd | nd | nd |
| Total                                | 35                  | 7 | 41 | 17 | 14            | 4  | 34 | 48 | 19            | 7 | 69 | 5 | 19         | 5  | 67 | 9  |
| <b><math>\lambda 5</math></b>        |                     |   |    |    |               |    |    |    |               |   |    |   |            |    |    |    |
| PCNA <sup>-</sup>                    | 22                  | 4 | 31 | 5  | 12            | 9  | 3  | 0  | 92            | 3 | 3  | 0 | 94         | 4  | 2  | 0  |
| PCNA <sup>+</sup>                    | 14                  | 1 | 5  | 18 | 22            | 9  | 41 | 4  | 2             | 0 | 0  | 0 | nd         | nd | nd | nd |
| Total                                | 36                  | 5 | 36 | 23 | 34            | 18 | 44 | 4  | 94            | 3 | 3  | 0 | 94         | 4  | 2  | 0  |

<sup>a</sup> RNA-FISH using probes specific for CD45 and  $\lambda 5$  was performed on *ex vivo* BM cells representing distinct developmental stages. <sup>b</sup> Cells were sorted using antibodies recognizing stage-specific surface markers. Pre-BII cells were sorted into the large and small stage using forward scatter. <sup>c</sup> Percentages of nuclei with 0, 1, 2 or 4 signals staining as PCNA<sup>-</sup> or PCNA<sup>+</sup> (S phase) are shown, except for immature B cells where PCNA was not used. The data shown is from one representative experiment. The number of nuclei counted from each fraction and for each probe was ~150.
