# Supplementary material
Source: PubMed Central journal article supplement (PMC1283949)
Supplement: 7600850s3.pdf [file 7600850s3.pdf]

**Parker et al, Suppl 3**

Transcription pattern of the  $\lambda 5$  gene after induction of pre-BCR expression

| Induction of pre-BCR expression on <i>in vitro</i> cultured pre-B cells <sup>a</sup> |       |    |    |       |    |    |       |    |    |       |    |    |       |    |    |
|--------------------------------------------------------------------------------------|-------|----|----|-------|----|----|-------|----|----|-------|----|----|-------|----|----|
|                                                                                      | Day 0 |    |    | Day 1 |    |    | Day 2 |    |    | Day 3 |    |    | Day 4 |    |    |
| SL <sup>+</sup> cells                                                                | 77    |    |    | 79    |    |    | 71    |    |    | <5    |    |    | <5    |    |    |
| $\mu$ H <sup>+</sup> SL <sup>+</sup> cells                                           | 0     |    |    | 40    |    |    | 63    |    |    | <5    |    |    | <5    |    |    |
| % c-kit <sup>+</sup> cells                                                           | 44    |    |    | 25    |    |    | 9     |    |    | 5     |    |    | 2     |    |    |
| % CD25 <sup>+</sup> cells                                                            | 1     |    |    | 7     |    |    | 30    |    |    | 55    |    |    | 62    |    |    |
| large cells                                                                          | 45    |    |    | 45    |    |    | 58    |    |    | 46    |    |    | 5     |    |    |
| RNA signals per nucleus <sup>b</sup>                                                 |       |    |    |       |    |    |       |    |    |       |    |    |       |    |    |
|                                                                                      | 1     | 2  | 4  | 1     | 2  | 4  | 1     | 2  | 4  | 1     | 2  | 4  | 1     | 2  | 4  |
| CD45                                                                                 |       |    |    |       |    |    |       |    |    |       |    |    |       |    |    |
| PCNA <sup>-</sup> <sup>c</sup>                                                       | 3     | 39 | 2  | 3     | 42 | 2  | 2     | 45 | 2  | 7     | 41 | 5  | 4     | 64 | 3  |
| PCNA <sup>+</sup>                                                                    | 0     | 4  | 15 | 0     | 3  | 18 | 1     | 7  | 27 | 2     | 7  | 15 | 0     | 1  | 8  |
| Total                                                                                | 3     | 43 | 17 | 3     | 45 | 20 | 3     | 52 | 29 | 9     | 48 | 20 | 4     | 65 | 11 |
| $\lambda 5$                                                                          |       |    |    |       |    |    |       |    |    |       |    |    |       |    |    |
| PCNA <sup>-</sup>                                                                    | 1     | 37 | 1  | 6     | 42 | 4  | 5     | 34 | 1  | 14    | 13 | 1  | 5     | 1  | 0  |
| PCNA <sup>+</sup>                                                                    | 1     | 6  | 17 | 1     | 2  | 14 | 1     | 11 | 13 | 0     | 15 | 5  | 1     | 3  | 0  |
| Total                                                                                | 2     | 43 | 18 | 7     | 44 | 18 | 6     | 45 | 14 | 14    | 28 | 6  | 6     | 4  | 0  |

<sup>a</sup> CD19<sup>+</sup> BM cells from tet- $\mu$ H mice were purified and cultured *in vitro* for four days. Each day samples were analyzed by: FACS, to determine the percentages of surface SL<sup>+</sup>,  $\mu$ H<sup>+</sup>, i.e. pre-BCR<sup>+</sup> cells and cell size and by immuno-RNA-FISH to investigate the transcriptional status of the CD45 and  $\lambda 5$  genes. <sup>b</sup> Nuclei contained either 1, 2 or 4 discrete RNA signals. <sup>c</sup> Percentages of the total nuclei with either 1, 2 or 4 signals staining as PCNA<sup>-</sup> or PCNA<sup>+</sup> (S phase) are shown. The data shown is from one representative experiment. The number of nuclei counted from each day and for each probe was >150.
