# Supplementary material
Source: PubMed Central journal article supplement (PMC1283949)
Supplement: 7600850s4.pdf [file 7600850s4.pdf]

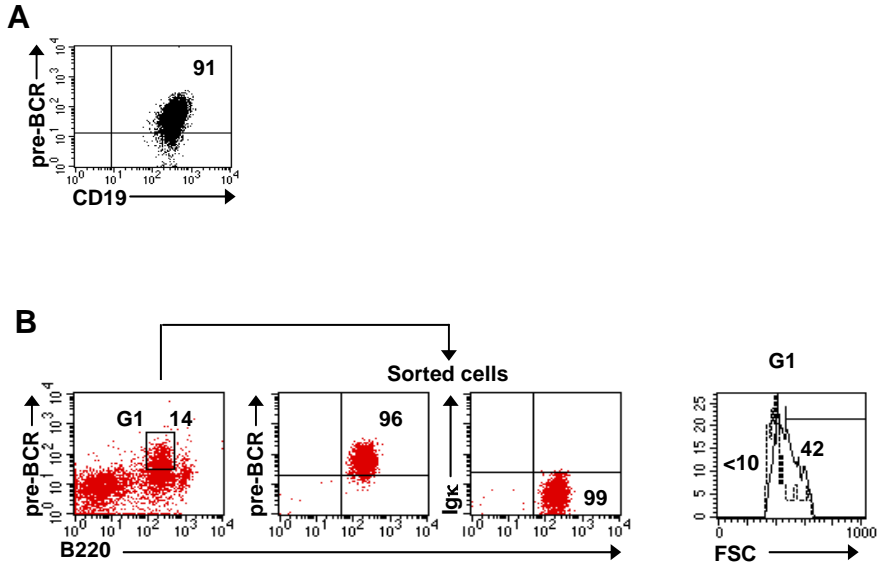

Pre-B cells from SLP-65-deficient mice. (A) FACS analysis of *in vitro* cultured SLP-65<sup>-/-</sup> pre-B cells (clone 26.5). (B) Sorting of pre-BCR<sup>+</sup> cells after staining for B220, pre-BCR (SL156) and Igκ (G1, B220<sup>+</sup>SL156<sup>+</sup>Igκ<sup>-</sup>). The numbers indicate the percentage of pre-BCR<sup>+</sup> cells before and after sorting. FSC histogram of the cells in G1 (solid line) overlaid with that of B220<sup>+</sup>CD25<sup>+</sup> cells (dotted line) from the same cell preparation. The numbers indicate the percentage of large cells.
