# Supplementary material
Source: PubMed Central journal article supplement (PMC1283949)
Supplement: 7600850s5.pdf [file 7600850s5.pdf]

## Parker et al, Suppl 5

Total numbers of nuclei and alleles scored for DNA-FISH analysis <sup>a</sup>

|                             | pre-BI <sup>b</sup>                      | large<br>pre-BII | small<br>pre-BII | pre-BII <sup>c</sup> | mature B |
|-----------------------------|------------------------------------------|------------------|------------------|----------------------|----------|
|                             | heterochromatin association <sup>d</sup> |                  |                  |                      |          |
| wt                          | 53                                       | 55               | 55               | -                    | 53       |
| <i>VpreB</i> <sup>-/-</sup> | 48                                       | -                | -                | 49                   | 51       |
|                             | peripheral positioning <sup>d</sup>      |                  |                  |                      |          |
| wt                          | 84                                       | 76               | 102              | -                    | 100      |
| <i>VpreB</i> <sup>-/-</sup> | 96                                       | -                | -                | 68                   | 92       |

<sup>a</sup> DNA-FISH using probes specific for  $\gamma$ -satellite DNA and the *VpreB1/λ5* locus was performed on *ex vivo* BM cells representing distinct developmental stages. <sup>b</sup> Cells were sorted using antibodies recognising stage-specific surface markers. Pre-BII cells were sorted as large and small cells using forward scatter. <sup>c</sup> The total pre-BII population was sorted from *VpreB*<sup>-/-</sup> mice. <sup>d</sup> Total numbers of nuclei and alleles scored when examining heterochromatin association and peripheral positioning, respectively, are shown.
