# Supplementary material
Source: PubMed Central journal article supplement (PMC1283949)
Supplement: 7600850s6.pdf [file 7600850s6.pdf]

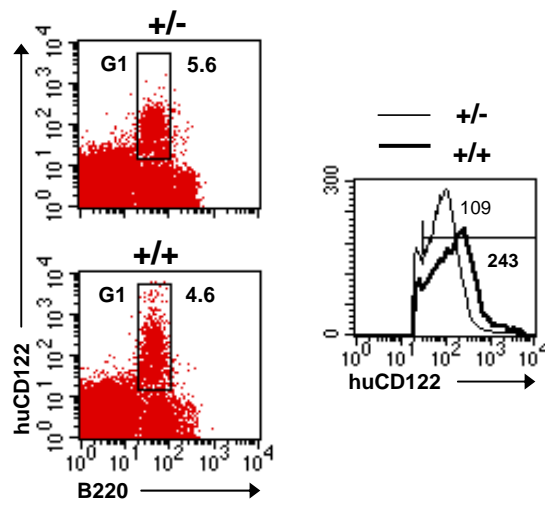

FACS analysis comparing reporter protein (HuCD122) expression levels in hetero- and homozygous transgenic mice. Cells were gated (G1) and HuCD122 levels shown as overlays, with mean fluorescence intensities indicated. Representative results from one experiment out of three.
